# Supplementary material
Source: publisher figshare collection journal article supplement (https://tandf.figshare.com/articles/dataset/_/6267287)
Supplement: Supplementary file 2 [file 2]

Archive with 3 entries (3 files):
- Long Axis View of AV.avi
- Short axis view of AV.avi
- Supplemental File.pdf
